# Supplementary material
Source: PubMed Central journal article supplement (PMC7509870)
Supplement: advancesADV2020002553-suppl1.pdf [file advancesADV2020002553-suppl1.pdf]

### Supplementary Figure 1: Consort diagram

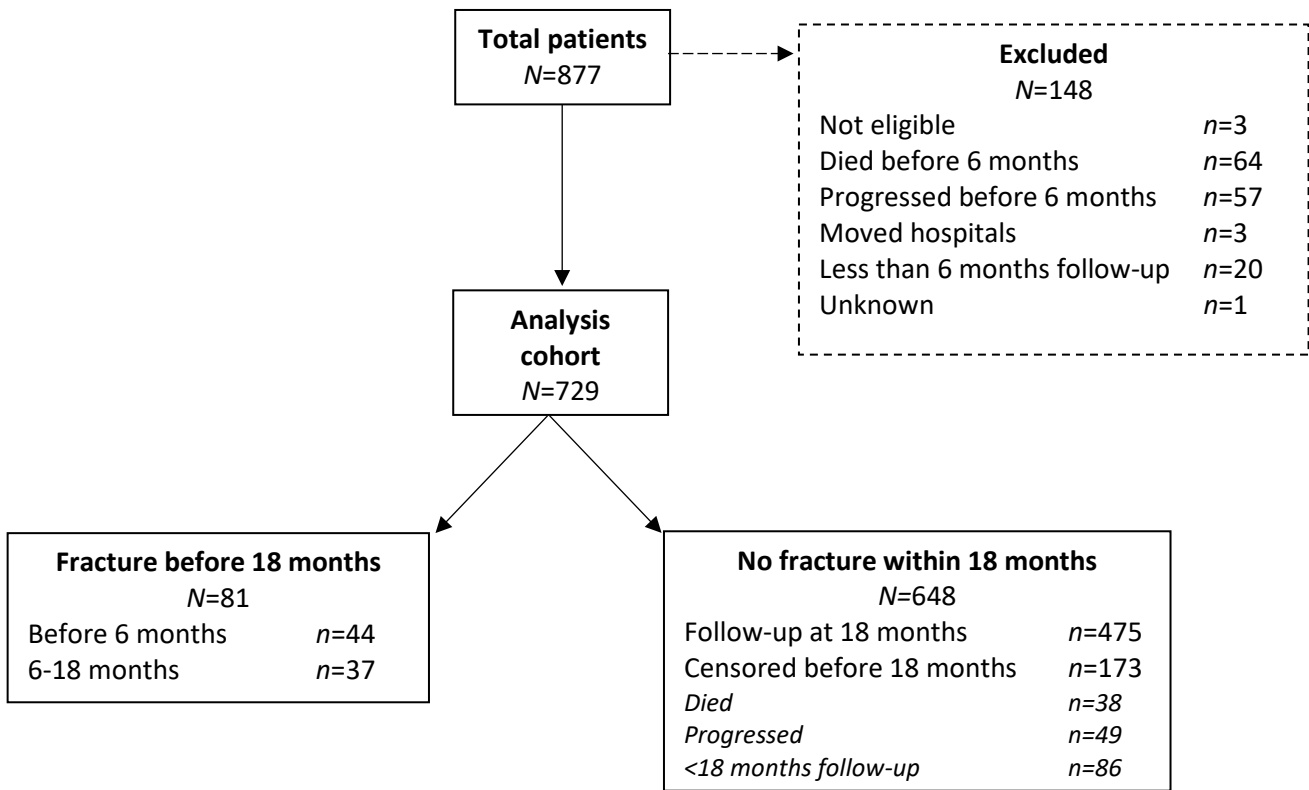

**Supplementary Table 1. Fractures according to R-CHOP cycles and use of pre-phase steroids.**

|                                      | <b>All patients</b><br><b>N = 729</b><br><b>N (%)</b> | <b>Fracture</b><br><b>N = 81</b><br><b>N (%)</b> | <b>No fracture</b><br><b>N = 648</b><br><b>N (%)</b> |
|--------------------------------------|-------------------------------------------------------|--------------------------------------------------|------------------------------------------------------|
| <b>R-CHOP Cycles, N (%)</b>          |                                                       |                                                  |                                                      |
| 1                                    | 11 (1.5)                                              | 0 (0.0)                                          | 11 (1.7)                                             |
| 2                                    | 11 (1.5)                                              | 2 (2.5)                                          | 9 (1.4)                                              |
| 3                                    | 39 (5.3)                                              | 2 (2.5)                                          | 37 (5.7)                                             |
| 4                                    | 71 (9.7)                                              | 5 (6.2)                                          | 66 (10.2)                                            |
| 5                                    | 24 (3.3)                                              | 3 (3.7)                                          | 21 (3.2)                                             |
| 6                                    | 540 (74.1)                                            | 66 (81.5)                                        | 474 (73.1)                                           |
| 7                                    | 3 (0.4)                                               | 0 (0.0)                                          | 3 (0.5)                                              |
| 8                                    | 30 (4.1)                                              | 3 (3.7)                                          | 27 (4.2)                                             |
| <b>R-CHOP cycles, median (range)</b> | <b>6 (1- 8)</b>                                       | <b>6 (2- 8)</b>                                  | <b>6(1- 8)</b>                                       |
| <b>Steroid Pre-phase, N (%)</b>      |                                                       |                                                  |                                                      |
| No                                   | 526 (73.9)                                            | 53 (65.4)                                        | 473 (75.0)                                           |
| Yes                                  | 186 (26.1)                                            | 28 (34.6)                                        | 158 (25.0)                                           |
| Unknown                              | 17                                                    | 0                                                | 17                                                   |

Abbreviations: R-CHOP rituximab, cyclophosphamide, doxorubicin, vincristine and prednisolone.

**Supplementary Table 2. Fractures according to history of bone-protective medication.**

|                                     | <b>All patients</b><br><b>N = 729</b><br><b>N (%)</b> | <b>Fracture</b><br><b>N = 81</b><br><b>N (%)</b> | <b>No fracture</b><br><b>N = 648</b><br><b>N (%)</b> |
|-------------------------------------|-------------------------------------------------------|--------------------------------------------------|------------------------------------------------------|
| <b>Vitamin D supplements, N (%)</b> |                                                       |                                                  |                                                      |
| No                                  | 614 (95.5)                                            | 76 (98.7)                                        | 538 (95.1)                                           |
| Yes                                 | 29 (4.5)                                              | 1 (1.3)                                          | 28 (4.9)                                             |
| Unknown                             | 86                                                    | 4                                                | 82                                                   |
| <b>Calcium supplements, N (%)</b>   |                                                       |                                                  |                                                      |
| No                                  | 632 (88.8)                                            | 64 (82.1)                                        | 568 (89.6)                                           |
| Yes                                 | 80 (11.2)                                             | 14 (17.9)                                        | 66 (10.4)                                            |
| Missing                             | 17                                                    | 3                                                | 14                                                   |
| <b>Bisphosphonates, N (%)</b>       |                                                       |                                                  |                                                      |
| No                                  | 669 (94.0)                                            | 69 (88.5)                                        | 600 (94.6)                                           |
| Yes                                 | 43 (6.0)                                              | 9 (11.5)                                         | 34 (5.4)                                             |
| Unknown                             | 17                                                    | 3                                                | 14                                                   |

**Supplementary Table 3. Univariable analysis of risk factors for fracture.**

| Risk factor                                         | All data |                  |                  | Complete cases only |                   |                  |
|-----------------------------------------------------|----------|------------------|------------------|---------------------|-------------------|------------------|
|                                                     | Event    | HR (95% CI)      | p-value          | Events/             | HR (95% CI)       | p-value          |
| <b>Age (increase of 10 years)</b>                   | 81/72    | 1.03 (0.68-1.58) | 0.88             | 67/554              | 0.85 (0.52-1.37)  | 0.50             |
| <b>Sex</b>                                          |          |                  |                  |                     |                   |                  |
| Male                                                | 29/35    | 1.00             | <b>0.019</b>     | 24/268              | 1.00              | <b>0.033</b>     |
| Female                                              | 52/37    | 1.71 (1.09-2.70) |                  | 43/286              | 1.71 (1.04-2.82)  |                  |
| <b>ECOG</b>                                         |          |                  |                  |                     |                   |                  |
| ECOG 0                                              | 29/35    | 1.00             | 0.53*            | 24/268              | 1.00              | 0.43*            |
| ECOG 1                                              | 37/32    | 1.25 (1.11-1.41) |                  | 34/245              | 1.39 (1.22-1.57)  |                  |
| ECOG 2                                              | 14/14    | 0.85 (0.73-0.99) |                  | 11/105              | 0.87 (0.74-1.03)  |                  |
| ECOG 3-4                                            | 8/91     | 1.16 (0.99-1.37) |                  | 6/69                | 1.04 (0.87-1.25)  |                  |
| <b>IPI</b>                                          |          |                  |                  |                     |                   |                  |
| 0-2                                                 | 34/32    | 1.00             | 0.50             | 29/245              | 1.00              | 0.47             |
| 3-5                                                 | 45/37    | 1.16 (0.75-1.82) |                  | 38/295              | 1.11 (0.68-1.79)  |                  |
| <b>BMI group</b>                                    |          |                  |                  |                     |                   |                  |
| Underweight                                         | 32/31    | 1.60 (0.62-4.11) |                  | 28/238              | 1.79 (0.69-4.63)  |                  |
| Normal                                              | 5/32     | 1.00             | 0.56             | 5/25                | 1.00              | 0.46             |
| Overweight                                          | 25/23    | 1.03 (0.61-1.74) |                  | 19/185              | 0.86 (0.48-1.54)  |                  |
| Obese                                               | 19/13    | 1.39 (0.79-2.46) |                  | 15/106              | 1.21 (0.65-2.27)  |                  |
| <b>Current smoker</b>                               |          |                  |                  |                     |                   |                  |
| No                                                  | 72/61    | 1.00             | 0.89             | 63/530              | 1.00              | 0.48             |
| Yes                                                 | 4/32     | 1.07 (0.39-2.94) |                  | 4/24                | 1.44 (0.53-3.97)  |                  |
| <b>Known osteoporosis or osteopenia</b>             |          |                  |                  |                     |                   |                  |
| No                                                  | 65/65    | 1.00             | <b>&lt;0.001</b> | 53/497              | 1.00              | <b>0.0005</b>    |
| Yes                                                 | 16/63    | 2.74 (1.58-4.73) |                  | 14/51               | 2.75 (1.52-4.95)  |                  |
| <b>Rheumatoid arthritis</b>                         |          |                  |                  |                     |                   |                  |
| No                                                  | 74/69    | 1.00             | <b>0.036</b>     | 60/531              | 1.00              | <b>0.0041</b>    |
| Yes                                                 | 7/30     | 2.24 (1.03-4.87) |                  | 7/22                | 2.98 (1.36-6.52)  |                  |
| <b>Type 2 Diabetes</b>                              |          |                  |                  |                     |                   |                  |
| No                                                  | 70/63    | 1.00             | 0.54             | 56/493              | 1.00              | 0.13             |
| Yes                                                 | 11/84    | 1.22 (0.64-2.30) |                  | 11/61               | 1.65 (0.86-3.15)  |                  |
| <b>Inflammatory Bowel Disease</b>                   |          |                  |                  |                     |                   |                  |
| No                                                  | 81/70    | 1.00             | 0.55             | 67/545              | 1.00              | 0.31             |
| Yes                                                 | 0/10     | _*               |                  | 0/8                 | _*                |                  |
| <b>History of alcohol abuse</b>                     |          |                  |                  |                     |                   |                  |
| No                                                  | 76/61    | 1.00             | 0.15             | 66/529              | 1.00              | 0.21             |
| Yes                                                 | 1/29     | 0.26 (0.04-1.90) |                  | 1/25                | 0.31 (0.04-2.20)  |                  |
| <b>Steroids within last 12 months</b>               |          |                  |                  |                     |                   |                  |
| No                                                  | 70/65    | 1.00             | 0.59             | 61/507              | 1.00              | 0.95             |
| Yes                                                 | 8/60     | 1.23 (0.59-2.55) |                  | 6/47                | 1.03 (0.44-2.38)  |                  |
| <b>Raised ALP</b>                                   |          |                  |                  |                     |                   |                  |
| No                                                  | 65/59    | 1.00             | 0.70             | 53/456              | 1.00              | 0.48             |
| Yes                                                 | 15/12    | 1.12 (0.64-1.96) |                  | 14/98               | 1.23 (0.68-2.22)  |                  |
| <b>Calcium level</b>                                |          |                  |                  |                     |                   |                  |
| Low                                                 | 69/60    | 0.98 (0.14-7.03) |                  | 59/484              | 1.04 (0.14, 7.50) |                  |
| Normal                                              | 1/9      | 1.00             | 0.75*            | 1/8                 | 1.00              | 0.85*            |
| High                                                | 8/80     | 0.88 (0.42-1.83) |                  | 7/62                | 0.93 (0.42-2.03)  |                  |
| <b>Bone-protective medication*</b>                  |          |                  |                  |                     |                   |                  |
| No medication, no predisposing history <sup>†</sup> | 48/53    | 1.00             | <b>0.0015</b>    | 40/411              | 1.00              | <b>0.0014</b>    |
| No medication, predisposing history                 | 12/69    | 2.02 (1.07-3.81) |                  | 11/56               | 2.11 (1.08-4.12)  |                  |
| Medication, no predisposing history                 | 4/48     | 0.89 (0.32-2.48) |                  | 4/44                | 0.90 (0.32-2.50)  |                  |
| Medication and predisposing history                 | 13/53    | 2.86 (1.55-5.28) |                  | 12/43               | 3.02 (1.58-5.76)  |                  |
| <b>Bone involvement</b>                             |          |                  |                  |                     |                   |                  |
| No                                                  | 46/55    | 1.00             | <b>&lt;0.001</b> | 39/423              | 1.00              | <b>&lt;0.001</b> |
| Yes, without fracture                               | 23/12    | 2.41 (1.46-3.98) |                  | 18/94               | 2.23 (1.27-3.90)  |                  |
| Yes, with fracture                                  | 12/47    | 3.51 (1.86-6.63) |                  | 10/37               | 3.31 (1.65-6.63)  |                  |
| <b>Prior Fracture</b>                               |          |                  |                  |                     |                   |                  |
| No                                                  | 62/61    | 1.00             | <b>0.0014</b>    | 50/465              | 1.00              | <b>0.0066</b>    |
| Yes, not at baseline                                | 4/44     | 0.88 (0.32-2.42) |                  | 4/37                | 0.97 (0.35-2.70)  |                  |
| Yes, at baseline                                    | 15/62    | 2.68 (1.52-4.71) |                  | 13/52               | 2.57 (1.39-4.73)  |                  |
| <b>Non-Lymphoma fracture at baseline</b>            |          |                  |                  |                     |                   |                  |
| No                                                  | 77/70    | 1.00             | 0.16             | 63/535              | 1.00              | 0.19             |
| Yes                                                 | 4/20     | 2.01 (0.74-5.49) |                  | 4/19                | 1.96 (0.71-5.37)  |                  |
| <b>Steroid pre-phase</b>                            |          |                  |                  |                     |                   |                  |
| No                                                  | 53/52    | 1.00             | 0.064            | 43/415              | 1.00              | <b>0.030</b>     |
| Yes                                                 | 28/18    | 1.54 (0.97-2.43) |                  | 24/139              | 1.73 (1.05-2.84)  |                  |

Abbreviations: ALP alkaline phosphatase; BMI bone mass index; CI confidence interval; ECOG eastern cooperative oncology group; HR hazard ratio; IPI international prognostic index. \*Bone-protective medication includes vitamin D, calcium, and / or bisphosphonates. †Predisposing history includes: osteoporosis, osteopenia, previous fracture and/or rheumatoid arthritis
